# Supplementary material for: Facilitation of Rice Stripe Virus Accumulation in the Insect Vector by Himetobi P Virus VP1
Source: MDPI journal article supplement (doi:10.3390/v7031492), 2015-03-23
Supplement: s1 [file s1]

## Supplementary Files

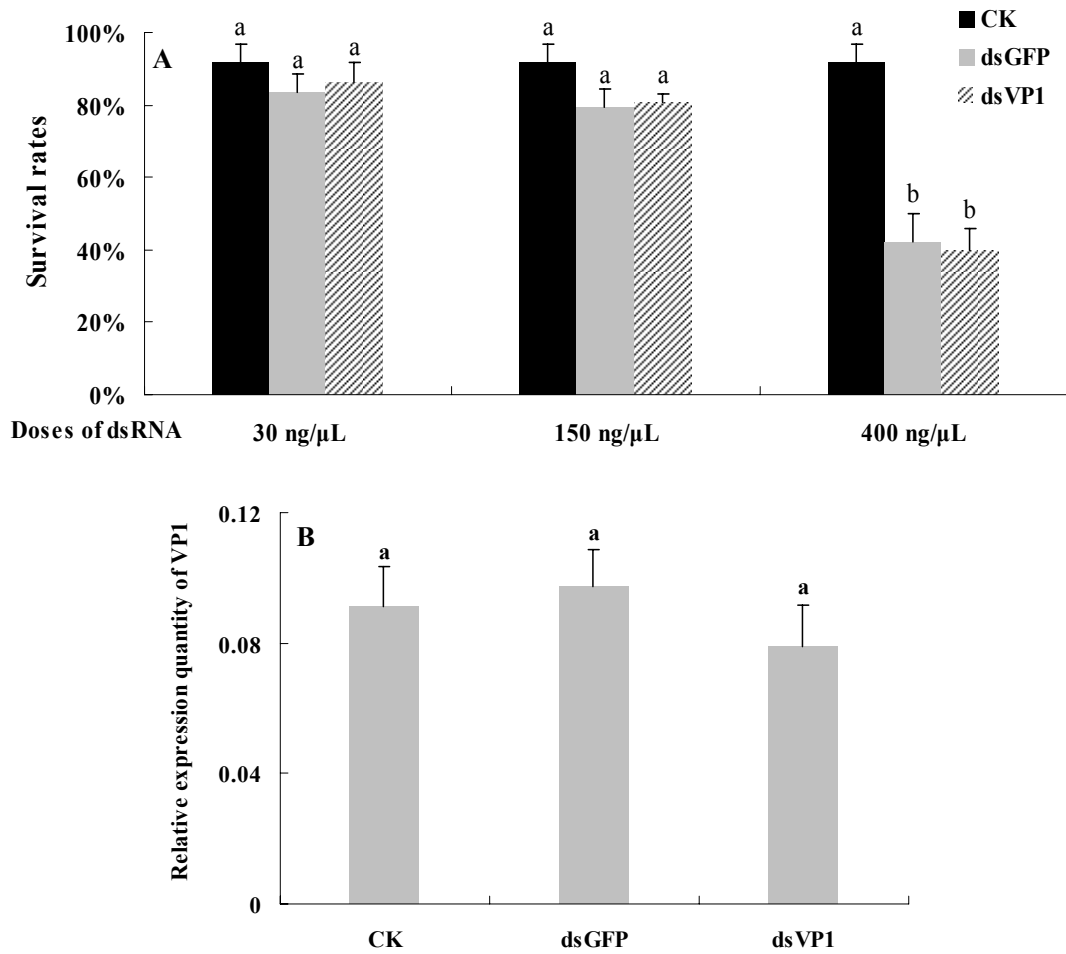

**Figure S1.** The survival rate and RNAi efficiency of SBPH in the dsRNA ingestion experiment. **(A)** The survival rate of SBPH after feeding different dose dsRNA for 6 days. CK is feeding the artificial diets without dsRNA. **(B)** The efficiency of RNAi in SBPH after feeding low doses of dsRNA (30 ng/μL). After qRT-PCR, the levels of HiPV *VPI* transcripts were normalized relative to the  $\beta$ -*actin* transcript according to the  $\Delta C_T$  algorithm. Each histogram bar represents the mean ( $\pm$ SE) from three repeats, and the different letters above the error bars indicate significant difference as per Tukey's honest significant difference (HSD) test ( $p < 0.05$ ).
